# Supplementary material
Source: MDPI journal article supplement (https://www.mdpi.com/2072-4292/14/14/3396)
Supplement: s1 [file s1 › remotesensing-1752160-supplementary.pdf]

# Comparing CNNs and Random Forests for Landsat Image Segmentation Trained on a Large Proxy Land Cover Dataset

## Supplementary Material

**Table S1. Class correspondence of ALUMv8 land use classes and simplified land cover classes \*.**  
\* Secondary ALUM class names (corresponding to ALUM codes ending in 0) are listed in **bold**.

| ALUMv8 tertiary code  | ALUMv8 tertiary name                                                                                                                                                                                                                                                                          | Simplified land cover class | ALUMv8 tertiary code                        | ALUMv8 tertiary name                                                                                                                                                                                                                                                                                                                                                                                                                                                                                                                     | Simplified land cover class |
|-----------------------|-----------------------------------------------------------------------------------------------------------------------------------------------------------------------------------------------------------------------------------------------------------------------------------------------|-----------------------------|---------------------------------------------|------------------------------------------------------------------------------------------------------------------------------------------------------------------------------------------------------------------------------------------------------------------------------------------------------------------------------------------------------------------------------------------------------------------------------------------------------------------------------------------------------------------------------------------|-----------------------------|
| 110-113               | <b>Nature conservation</b> , Strict nature reserves, Wilderness area, National park                                                                                                                                                                                                           | Forest                      | 420-424                                     | <b>Grazing irrigated modified pastures</b> , Irrigated woody fodder plants, Irrigated pasture legumes, Irrigated legume/grass mixtures, Irrigated sown grasses                                                                                                                                                                                                                                                                                                                                                                           | Grassland                   |
| 114                   | Natural feature protection                                                                                                                                                                                                                                                                    | Unknown                     | 430-439                                     | <b>Irrigated cropping</b> , Irrigated cereals, Irrigated beverage and spice crops, Irrigated hay and silage, Irrigated oilseeds, Irrigated sugar, Irrigated cotton, Irrigated alkaloid poppies, Irrigated pulses, Irrigated rice                                                                                                                                                                                                                                                                                                         | Crop                        |
| 115-116               | Habitat/species management area, Protected landscape                                                                                                                                                                                                                                          | Forest                      | 440-449, 450-454                            | <b>Irrigated perennial horticulture</b> , Irrigated tree fruits, Irrigated olives, Irrigated tree nuts, Irrigated vine fruits, Irrigated shrub berries and fruits, Irrigated perennial flowers and bulbs, Irrigated perennial vegetables and herbs, Irrigated citrus, Irrigated grapes, <b>Irrigated seasonal horticulture</b> , Irrigated seasonal fruits, Irrigated seasonal flowers and bulbs, Irrigated seasonal vegetables and herbs, Irrigated turf farming                                                                        | Horticulture                |
| 117, 120-125, 130-132 | Other conserved area, <b>Managed resource protection</b> , Biodiversity, Surface water supply, Groundwater, Landscape, Traditional Indigenous uses, <b>Other minimal use</b> , Defence land - natural areas, Stock route                                                                      | Unknown                     | 460-465, 510-515, 520-528                   | <b>Irrigated land in transition</b> , Degraded irrigated land, Abandoned irrigated land, Irrigated land under rehabilitation, No defined use - irrigation, Abandoned irrigated perennial horticulture, <b>Intensive horticulture</b> , Production nurseries, Shadehouses, Glasshouses, Glasshouses - hydroponic, Abandoned intensive horticulture, <b>Intensive animal production</b> , Dairy sheds and yards, Feedlots, Poultry farms, Piggeries, Aquaculture, Horse studs, Saleyards/stockyards, Abandoned intensive animal production | Unknown                     |
| 133-134               | Residual native cover, Rehabilitation                                                                                                                                                                                                                                                         | Forest                      | 530-538, 540-541                            | <b>Manufacturing and industrial</b> , General purpose factory, Food processing factory, Major industrial complex, Bulk grain storage, Abattoirs, Oil refinery, Sawmill, Abandoned manufacturing and industrial, <b>Residential and farm infrastructure</b> , Urban residential                                                                                                                                                                                                                                                           | Built-up                    |
| 210                   | <b>Grazing native vegetation</b>                                                                                                                                                                                                                                                              | Grassland                   | 542-543                                     | Rural residential with agriculture, Rural residential without agriculture                                                                                                                                                                                                                                                                                                                                                                                                                                                                | Unknown                     |
| 220-222               | <b>Production native forests</b> , Wood production forestry, Other forest production                                                                                                                                                                                                          | Forest                      | 544-545, 550-555                            | Remote communities, Farm buildings/infrastructure, <b>Services</b> , Commercial services, Public services, Recreation and culture, Defence facilities - urban, Research facilities                                                                                                                                                                                                                                                                                                                                                       | Built-up                    |
| 310-314               | <b>Plantation forests</b> , Hardwood plantation forestry, Softwood plantation forestry, Other forest plantation, Environmental forest plantation                                                                                                                                              | Plantation                  | 560-567                                     | <b>Utilities</b> , Fuel powered electricity generation, Hydro electricity generation, Wind electricity generation, Solar electricity generation, Electricity substations and transmission, Gas treatment storage and transmission, Water extraction and transmission                                                                                                                                                                                                                                                                     | Unknown                     |
| 320-325               | <b>Grazing modified pastures</b> , Native/exotic pasture mosaic, Woody fodder plants, Pasture legumes, Pasture legume/grass mixtures, Sown grasses                                                                                                                                            | Grassland                   | 570-575                                     | <b>Transport and communication</b> , Airports/aerodromes, Roads, Railways, Ports and water transport, Navigation and communication                                                                                                                                                                                                                                                                                                                                                                                                       | Built-up                    |
| 330-338               | <b>Cropping</b> , Cereals, Beverage and spice crops, Hay and silage, Oilseeds, Sugar, Cotton, Alkaloid poppies, Pulses                                                                                                                                                                        | Crop                        | 580-584                                     | <b>Mining</b> , Mines, Quarries, Tailings, Extractive Industry not in use                                                                                                                                                                                                                                                                                                                                                                                                                                                                | Bare                        |
| 340-349, 350-353      | <b>Perennial horticulture</b> , Tree fruits, Olives, Tree nuts, Vine fruits, Shrub berries and fruits, Perennial flowers and bulbs, Perennial vegetables and herbs, Citrus, Grapes, <b>Seasonal horticulture</b> , Seasonal fruits, Seasonal flowers and bulbs, Seasonal vegetables and herbs | Horticulture                | 590-595                                     | <b>Waste treatment and disposal</b> , Effluent pond, Landfill, Solid garbage, Incinerators, Sewage/sewerage                                                                                                                                                                                                                                                                                                                                                                                                                              | Unknown                     |
| 360-365               | <b>Land in transition</b> , Degraded land, Abandoned land, Land under rehabilitation, No defined use, Abandoned perennial horticulture                                                                                                                                                        | Unknown                     | 610-614, 620-623, 630-633, 640-643, 650-654 | <b>Lake</b> , Lake - conservation, Lake - production, Lake - intensive use, Lake - saline, <b>Reservoir/dam</b> , Reservoir, Water storage - intensive use/farm dams, Evaporation basin, <b>River</b> , River - conservation, River - production, River - intensive use, <b>Channel/aqueduct</b> , Supply channel/aqueduct, Drainage channel/aqueduct, Stormwater, <b>Marsh/wetland</b> , Marsh/wetland - conservation, Marsh/wetland - production, Marsh/wetland - intensive use, Marsh/wetland - saline                                | Water                       |
| 410-414               | <b>Irrigated plantation forests</b> , Irrigated hardwood plantation forestry, Irrigated softwood plantation forestry, Irrigated other forest plantation, Irrigated environmental forest plantation                                                                                            | Plantation                  | 660-663                                     | <b>Estuary/coastal waters</b> , Estuary/coastal waters - conservation, Estuary/coastal waters - production, Estuary/coastal waters - intensive use                                                                                                                                                                                                                                                                                                                                                                                       | Unknown                     |

**Table S2: Label data statistics – no. pixels of each land cover class for tile +14, –40 and study area <sup>+</sup>**  
<sup>+</sup> Study area was clipped to  $19968 \times 19968$  pixels to allow division evenly into  $128 \times 128$  pixel tiles. Note: weighted-mean F1 scores and class accuracies were calculated using class statistics (excluding the no data class) for the whole study area.

| Code         | Land Cover class | Tile +14, -40     |               | Study area         |               |
|--------------|------------------|-------------------|---------------|--------------------|---------------|
|              |                  | Count             | Percentage    | Count              | Percentage    |
| 0            | No data          | 92,020            | 0.6%          | 14,196,184         | 3.6%          |
| 1            | Forest           | 4,821,084         | 30.1%         | 112,447,908        | 28.2%         |
| 2            | Grassland        | 6,080,880         | 38.0%         | 130,618,500        | 32.8%         |
| 3            | Horticulture     | 39,224            | 0.2%          | 1,658,220          | 0.4%          |
| 4            | Crop             | 2,531,988         | 15.8%         | 118,481,376        | 29.7%         |
| 5            | Plantation       | 1,817,784         | 11.4%         | 5,676,428          | 1.4%          |
| 6            | Bare             | 6,160             | 0.04%         | 379,236            | 0.1%          |
| 7            | Water            | 390,076           | 2.4%          | 7,554,004          | 1.9%          |
| 8            | Built-up         | 220,784           | 1.4%          | 7,709,168          | 1.9%          |
| <b>TOTAL</b> |                  | <b>16,000,000</b> | <b>100.0%</b> | <b>398,721,024</b> | <b>100.0%</b> |

| Layer (type)                 | Output Shape            | Param # |
|------------------------------|-------------------------|---------|
| conv2d_1 (Conv2D)            | (None, None, None, 128) | 7040    |
| conv2d_2 (Conv2D)            | (None, None, None, 64)  | 73792   |
| conv2d_3 (Conv2D)            | (None, None, None, 32)  | 18464   |
| conv2d_transpose_1 (Conv2DTr | (None, None, None, 32)  | 9248    |
| conv2d_transpose_2 (Conv2DTr | (None, None, None, 64)  | 18496   |
| conv2d_transpose_3 (Conv2DTr | (None, None, None, 128) | 73856   |
| conv2d_4 (Conv2D)            | (None, None, None, 9)   | 10377   |
| Total params: 211,273        |                         |         |
| Trainable params: 211,273    |                         |         |
| Non-trainable params: 0      |                         |         |

**Figure S1: Autoencoder model summary. Input images are  $128 \times 128$  pixels. Output is a pixel-based land cover classification of nine classes (eight land cover classes plus no data).**

**Table S3: Model results – most accurate U-Net CNN and Random Forests model predictions in bold.**

| Model name                       | Epoch      | Model type            | Input         | Per class F1 scores |            |            |            |            |            |            |            | Weighted-mean F1 | Overall Acc. |
|----------------------------------|------------|-----------------------|---------------|---------------------|------------|------------|------------|------------|------------|------------|------------|------------------|--------------|
|                                  |            |                       |               | Forest              | Grassland  | Hort.      | Crop       | Plantation | Bare       | Water      | Built-up   |                  |              |
| ms_r1_ae_6b_e70.h5               | 70         | Autoencoder           | 6bands        | 78%                 | 80%        | 10%        | 18%        | 65%        | 10%        | 54%        | 43%        | 59%              | 72%          |
| <b>ex4.1_rf_rsp_e200_d30.sav</b> | <b>n/a</b> | <b>Random Forests</b> | <b>6bands</b> | <b>83%</b>          | <b>77%</b> | <b>4%</b>  | <b>50%</b> | <b>59%</b> | <b>8%</b>  | <b>35%</b> | <b>23%</b> | <b>68%</b>       | <b>73%</b>   |
| bm_r1_unet_6b_e79.h5             | 79         | Simple U-Net          | 6bands        | 86%                 | 80%        | 29%        | 58%        | 83%        | 1%         | 47%        | 40%        | 74%              | 78%          |
| bm_r1_urn18_6b_e45.h5            | 45         | U-Net ResNet18        | 6bands        | 85%                 | 80%        | 31%        | 57%        | 81%        | 24%        | 43%        | 42%        | 73%              | 77%          |
| ms_r1_urn34_6b_e60.h5            | 60         | U-Net ResNet34        | 6bands        | 86%                 | 79%        | 19%        | 40%        | 85%        | 23%        | 53%        | 39%        | 68%              | 76%          |
| bm_r2_urn50_6b_e36.h5            | 36         | U-Net ResNet50        | 6bands        | 85%                 | 81%        | 21%        | 65%        | 82%        | 20%        | 51%        | 43%        | 76%              | 79%          |
| bm_r1_urn101_6b_e39.h5           | 39         | U-Net ResNet101       | 6bands        | 85%                 | 80%        | 27%        | 63%        | 81%        | 21%        | 50%        | 40%        | 75%              | 78%          |
| bm_r1_urn152_6b_e39.h5           | 39         | U-Net ResNet152       | 6bands        | 83%                 | 75%        | 9%         | 57%        | 79%        | 17%        | 44%        | 32%        | 70%              | 73%          |
| bm_r1_urn50_b1_e19.h5            | 19         | U-Net ResNet50        | Blue          | 84%                 | 78%        | 12%        | 57%        | 77%        | 10%        | 49%        | 39%        | 72%              | 75%          |
| bm_r1_urn50_b2_e26.h5            | 26         | U-Net ResNet50        | Green         | 82%                 | 79%        | 24%        | 63%        | 74%        | 14%        | 49%        | 37%        | 73%              | 75%          |
| bm_r1_urn50_b3_e23.h5            | 23         | U-Net ResNet50        | Red           | 84%                 | 78%        | 17%        | 49%        | 77%        | 11%        | 46%        | 31%        | 69%              | 74%          |
| bm_r1_urn50_b4_e12.h5            | 12         | U-Net ResNet50        | NIR           | 74%                 | 73%        | 0%         | 61%        | 28%        | 0%         | 49%        | 24%        | 67%              | 67%          |
| bm_r1_urn50_b5_e22.h5            | 22         | U-Net ResNet50        | SWIR1         | 85%                 | 78%        | 9%         | 48%        | 73%        | 0%         | 52%        | 22%        | 68%              | 73%          |
| bm_r1_urn50_b6_e33.h5            | 33         | U-Net ResNet50        | SWIR2         | 83%                 | 78%        | 15%        | 50%        | 74%        | 1%         | 51%        | 27%        | 69%              | 74%          |
| bm_r1_urn50_bcdev_e17.h5         | 17         | U-Net ResNet50        | bcdev         | 71%                 | 65%        | 0%         | 60%        | 47%        | 0%         | 36%        | 17%        | 63%              | 63%          |
| bm_r1_urn50_sdev_e27.h5          | 27         | U-Net ResNet50        | sdev          | 67%                 | 59%        | 1%         | 62%        | 66%        | 0%         | 38%        | 20%        | 61%              | 62%          |
| bm_r1_urn50_edev_e16.h5          | 16         | U-Net ResNet50        | edev          | 73%                 | 75%        | 6%         | 61%        | 71%        | 0%         | 38%        | 24%        | 68%              | 70%          |
| bm_r1_urn50_RGB_e34.h5           | 34         | U-Net ResNet50        | RGB           | 86%                 | 79%        | 18%        | 55%        | 83%        | 13%        | 48%        | 43%        | 72%              | 77%          |
| bm_r1_urn50_NS1S2_e38.h5         | 38         | U-Net ResNet50        | NS1S2         | 86%                 | 81%        | 26%        | 62%        | 78%        | 19%        | 52%        | 44%        | 75%              | 78%          |
| bm_r1_urn50_RGBN_e34.h5          | 34         | U-Net ResNet50        | RGBN          | 86%                 | 79%        | 20%        | 52%        | 80%        | 24%        | 53%        | 34%        | 71%              | 76%          |
| bm_r1_urn50_TMADs_e29.h5         | 29         | U-Net ResNet50        | TMADs         | 85%                 | 80%        | 23%        | 66%        | 74%        | 10%        | 49%        | 20%        | 75%              | 77%          |
| <b>bm_r1_urn50_9b_e34.h5</b>     | <b>34</b>  | <b>U-Net ResNet50</b> | <b>9bands</b> | <b>87%</b>          | <b>80%</b> | <b>28%</b> | <b>67%</b> | <b>82%</b> | <b>18%</b> | <b>54%</b> | <b>47%</b> | <b>77%</b>       | <b>79%</b>   |

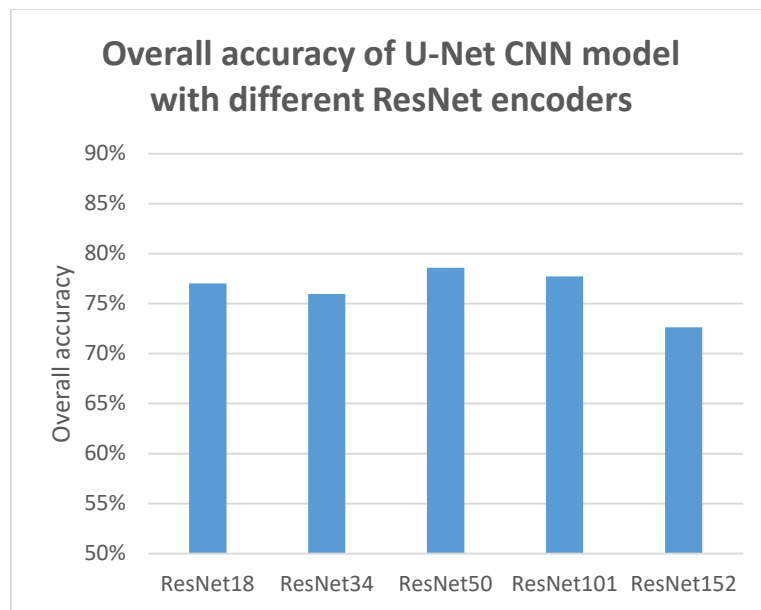

**Figure S2: Accuracy of U-Net CNN model using different ResNet encoders with ImageNet weights.**

**Table S4: U-Net CNN model (bm\_r1\_urn50\_9b\_e34.h5) v. label data confusion matrices for test tile.**

[illegible]

**Table S5: Random Forests modelling results for 6 band Landsat geomedian input. Best results highlighted**  
~ By sampling method: RSP (random sampling of pixels), SRS-Eq (stratified random sampling with equal samples for all classes), SRS-Prop (stratified random sampling proportional to area occupied by each class).

| Sampling Method | Trees      | Max. Depth | Per class F1 scores |              |              |              |              |             |              |              | Weighted-mean F1 | Overall Accuracy |
|-----------------|------------|------------|---------------------|--------------|--------------|--------------|--------------|-------------|--------------|--------------|------------------|------------------|
|                 |            |            | Forest              | Grassland    | Horticulture | Crop         | Plantation   | Bare        | Water        | Built-up     |                  |                  |
| RSP             | 50         | 10         | 82.3%               | 55.2%        | 2.7%         | 42.9%        | 68.6%        | 3.1%        | 26.4%        | 7.9%         | 57.7%            | 54.7%            |
| RSP             | 50         | 20         | 84.1%               | 75.7%        | 7.6%         | 48.1%        | 64.5%        | 9.4%        | 30.6%        | 16.9%        | 67.1%            | 71.0%            |
| RSP             | 50         | 30         | 83.1%               | 77.1%        | 5.5%         | 49.4%        | 58.0%        | 6.7%        | 34.0%        | 21.9%        | 67.7%            | 72.7%            |
| RSP             | 50         | 40         | 83.1%               | 77.0%        | 4.3%         | 48.9%        | 57.9%        | 6.6%        | 34.6%        | 21.4%        | 67.5%            | 72.7%            |
| RSP             | 50         | 50         | 83.1%               | 77.1%        | 3.8%         | 49.2%        | 58.1%        | 7.4%        | 32.7%        | 21.1%        | 67.6%            | 72.7%            |
| RSP             | 100        | 10         | 83.1%               | 55.4%        | 2.5%         | 42.9%        | 69.4%        | 3.9%        | 29.1%        | 8.1%         | 58.1%            | 55.0%            |
| RSP             | 100        | 20         | 84.0%               | 75.6%        | 7.2%         | 48.0%        | 63.8%        | 8.5%        | 29.9%        | 16.7%        | 67.0%            | 71.0%            |
| RSP             | 100        | 30         | 83.2%               | 77.3%        | 5.1%         | 49.6%        | 57.9%        | 7.3%        | 33.2%        | 22.5%        | 67.9%            | 72.9%            |
| RSP             | 100        | 40         | 83.1%               | 77.3%        | 4.2%         | 49.4%        | 58.0%        | 6.8%        | 31.8%        | 22.0%        | 67.7%            | 72.8%            |
| RSP             | 100        | 50         | 83.1%               | 77.3%        | 3.6%         | 49.5%        | 57.6%        | 9.0%        | 34.0%        | 21.4%        | 67.8%            | 72.8%            |
| RSP             | 200        | 10         | 82.7%               | 55.4%        | 2.5%         | 44.2%        | 69.4%        | 4.9%        | 27.9%        | 8.2%         | 58.4%            | 55.2%            |
| RSP             | 200        | 20         | 84.2%               | 76.0%        | 7.9%         | 47.9%        | 64.6%        | 9.7%        | 30.8%        | 18.0%        | 67.1%            | 71.3%            |
| <b>RSP</b>      | <b>200</b> | <b>30</b>  | <b>83.3%</b>        | <b>77.4%</b> | <b>4.2%</b>  | <b>49.6%</b> | <b>58.5%</b> | <b>7.8%</b> | <b>35.2%</b> | <b>22.9%</b> | <b>68.0%</b>     | <b>73.1%</b>     |
| RSP             | 200        | 40         | 83.1%               | 77.3%        | 3.3%         | 49.6%        | 57.6%        | 7.7%        | 33.8%        | 22.6%        | 67.8%            | 72.9%            |
| RSP             | 200        | 50         | 83.2%               | 77.3%        | 9.3%         | 49.7%        | 58.3%        | 5.9%        | 33.2%        | 22.0%        | 67.9%            | 73.0%            |
| RSP             | 300        | 10         | 83.0%               | 56.4%        | 2.8%         | 43.1%        | 68.8%        | 4.2%        | 29.5%        | 8.0%         | 58.5%            | 55.6%            |
| RSP             | 300        | 20         | 84.0%               | 76.1%        | 6.6%         | 48.6%        | 64.0%        | 11.1%       | 27.1%        | 17.9%        | 67.3%            | 71.4%            |
| RSP             | 300        | 30         | 83.1%               | 77.5%        | 8.5%         | 49.5%        | 58.2%        | 9.2%        | 29.8%        | 22.7%        | 67.8%            | 73.0%            |
| SRS-Eq          | 50         | 10         | 82.3%               | 58.1%        | 2.7%         | 42.2%        | 68.4%        | 3.9%        | 30.9%        | 8.3%         | 58.6%            | 56.1%            |
| SRS-Eq          | 50         | 20         | 83.3%               | 62.4%        | 3.7%         | 41.7%        | 71.8%        | 2.4%        | 25.8%        | 9.0%         | 60.2%            | 58.8%            |
| SRS-Eq          | 50         | 30         | 82.5%               | 59.1%        | 3.5%         | 40.7%        | 70.9%        | 1.8%        | 24.0%        | 8.0%         | 58.4%            | 56.6%            |
| SRS-Eq          | 50         | 40         | 82.7%               | 58.8%        | 3.4%         | 41.3%        | 71.2%        | 1.7%        | 23.8%        | 8.1%         | 58.6%            | 56.7%            |
| SRS-Eq          | 50         | 50         | 82.6%               | 58.6%        | 3.3%         | 41.3%        | 71.1%        | 1.7%        | 23.9%        | 8.0%         | 58.5%            | 56.6%            |
| SRS-Eq          | 100        | 10         | 82.3%               | 57.9%        | 2.7%         | 41.9%        | 68.5%        | 3.8%        | 30.9%        | 8.3%         | 58.4%            | 55.9%            |
| <b>SRS-Eq</b>   | <b>100</b> | <b>20</b>  | <b>83.5%</b>        | <b>63.3%</b> | <b>3.7%</b>  | <b>42.2%</b> | <b>72.1%</b> | <b>2.4%</b> | <b>24.9%</b> | <b>9.3%</b>  | <b>60.7%</b>     | <b>59.4%</b>     |
| SRS-Eq          | 100        | 30         | 82.8%               | 59.9%        | 3.6%         | 42.1%        | 71.3%        | 1.9%        | 24.2%        | 8.3%         | 59.2%            | 57.4%            |
| SRS-Pr          | 50         | 10         | 82.4%               | 56.3%        | 2.7%         | 42.6%        | 68.6%        | 6.0%        | 29.8%        | 8.2%         | 58.1%            | 55.3%            |
| SRS-Pr          | 50         | 20         | 84.0%               | 75.3%        | 6.0%         | 47.7%        | 64.7%        | 7.8%        | 29.4%        | 16.5%        | 66.7%            | 70.6%            |
| SRS-Pr          | 50         | 30         | 83.2%               | 77.2%        | 6.2%         | 49.5%        | 58.2%        | 6.6%        | 35.1%        | 22.2%        | 67.8%            | 72.9%            |
| SRS-Pr          | 50         | 40         | 83.0%               | 77.0%        | 8.3%         | 48.9%        | 57.6%        | 7.5%        | 33.3%        | 21.4%        | 67.5%            | 72.6%            |
| SRS-Pr          | 50         | 50         | 82.9%               | 77.0%        | 5.6%         | 49.4%        | 57.6%        | 7.2%        | 32.3%        | 21.3%        | 67.6%            | 72.6%            |
| SRS-Pr          | 100        | 10         | 83.0%               | 56.9%        | 2.4%         | 43.2%        | 68.8%        | 5.8%        | 31.4%        | 8.4%         | 58.7%            | 55.9%            |
| SRS-Pr          | 100        | 20         | 84.0%               | 75.6%        | 7.5%         | 48.4%        | 63.7%        | 11.2%       | 30.9%        | 16.9%        | 67.1%            | 71.0%            |
| <b>SRS-Pr</b>   | <b>100</b> | <b>30</b>  | <b>83.1%</b>        | <b>77.4%</b> | <b>5.3%</b>  | <b>49.8%</b> | <b>58.1%</b> | <b>7.6%</b> | <b>29.7%</b> | <b>22.9%</b> | <b>67.9%</b>     | <b>72.9%</b>     |
| <b>SRS-Pr</b>   | <b>100</b> | <b>40</b>  | <b>83.2%</b>        | <b>77.3%</b> | <b>4.5%</b>  | <b>49.8%</b> | <b>58.1%</b> | <b>6.0%</b> | <b>31.2%</b> | <b>22.4%</b> | <b>67.9%</b>     | <b>72.9%</b>     |
| SRS-Pr          | 100        | 50         | 83.2%               | 77.2%        | 4.1%         | 49.3%        | 58.3%        | 8.3%        | 31.1%        | 22.0%        | 67.7%            | 72.8%            |
| SRS-Pr          | 200        | 10         | 82.9%               | 55.9%        | 2.6%         | 43.4%        | 68.6%        | 4.1%        | 32.3%        | 8.0%         | 58.4%            | 55.4%            |
| SRS-Pr          | 200        | 20         | 84.0%               | 75.9%        | 6.5%         | 48.2%        | 64.1%        | 8.5%        | 28.7%        | 18.2%        | 67.1%            | 71.3%            |
| SRS-Pr          | 200        | 30         | 82.8%               | 77.3%        | 2.6%         | 49.1%        | 56.0%        | 6.2%        | 29.9%        | 21.3%        | 67.4%            | 72.6%            |

**Table S6: U-Net CNN model statistics – no. pixels of land cover classes for tile +14, -40 and study area.**

| Code         | Land cover class | Tile +14, -40     |               | Study area         |               |
|--------------|------------------|-------------------|---------------|--------------------|---------------|
|              |                  | Count             | Percentage    | Count              | Percentage    |
| 0            | No data          | 47                | 0.0%          | 12,512             | 0.0%          |
| 1            | Forest           | 4,046,773         | 25.3%         | 104,296,078        | 26.2%         |
| 2            | Grassland        | 6,990,386         | 43.7%         | 124,703,621        | 31.3%         |
| 3            | Horticulture     | 82,332            | 0.5%          | 2,403,360          | 0.6%          |
| 4            | Crop             | 2,281,698         | 14.3%         | 133,518,367        | 33.5%         |
| 5            | Plantation       | 2,119,612         | 13.2%         | 6,246,536          | 1.6%          |
| 6            | Bare             | 23,206            | 0.1%          | 1,401,930          | 0.4%          |
| 7            | Water            | 261,034           | 1.6%          | 18,574,094         | 4.7%          |
| 8            | Built-up         | 194,912           | 1.2%          | 7,564,526          | 1.9%          |
| <b>TOTAL</b> |                  | <b>16,000,000</b> | <b>100.0%</b> | <b>398,721,024</b> | <b>100.0%</b> |
